# Supplementary material
Source: PubMed Central journal article supplement (PMC6103638)
Supplement: NIHMS931361-supplement-3.pdf [file NIHMS931361-supplement-3.pdf]

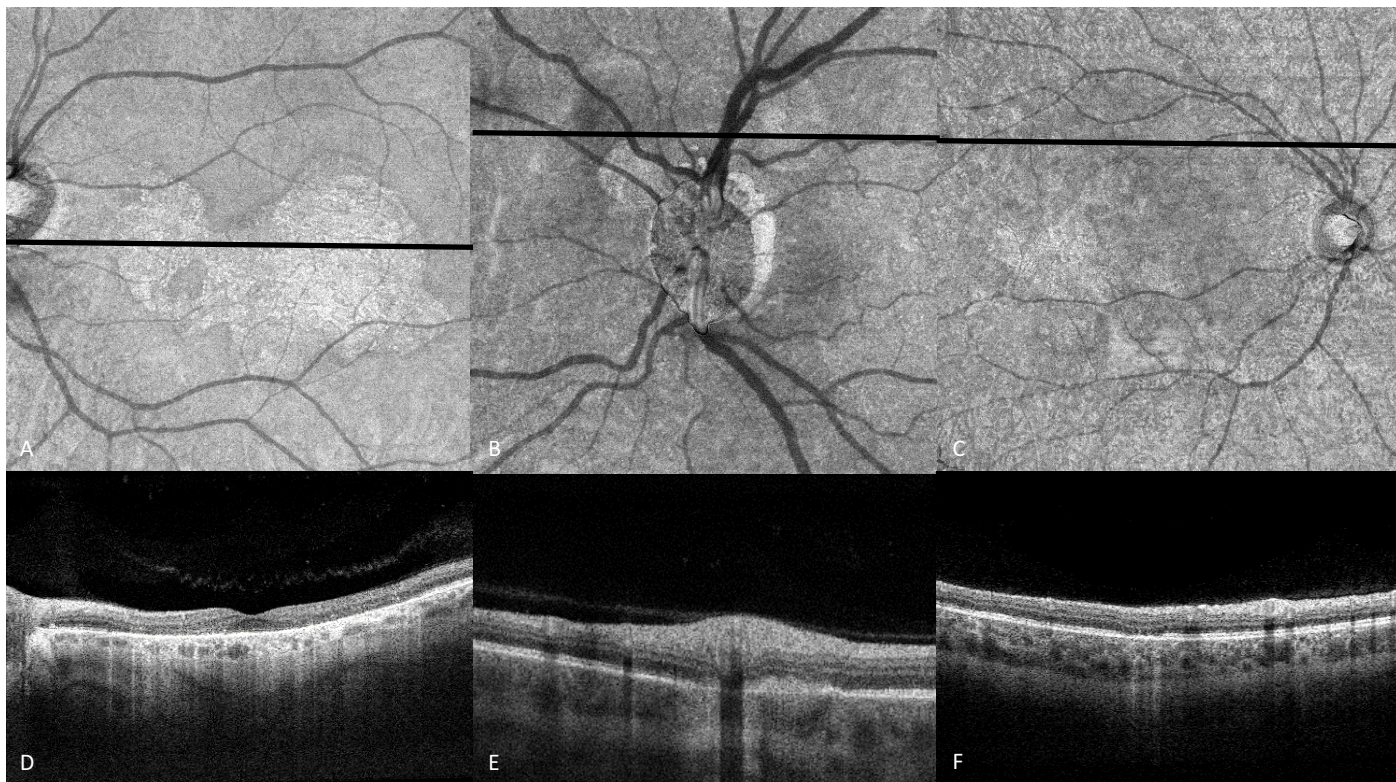

Figure 6 (Supplemental 3). Swept-source optical coherence tomography structural images of the choriocapillaris en-face (A, B, C) and B-scans (D, E, F) of Patient 1 (A, D), Patient 2 (B, E), and Patient 3 (C, F). Scans were taken when acute lesions had appeared (Patients 2 & 3), or on presentation (Patient 1). No evidence of signal attenuation is evident on en-face or B-scan images through the active lesions, suggesting that hyporeflective choriocapillaris flow signals were not due to overlying blockage. Black lines indicate the corresponding B-scan sections.
